# Supplementary material for: Comparison of sand fly trapping approaches for vector surveillance of Leishmania and Bartonella species in ecologically distinct, endemic regions of Peru
Source: PLoS Negl Trop Dis. 2021 Jul 14;15(7):e0009517. doi: 10.1371/journal.pntd.0009517 (PMC8279425; doi:10.1371/journal.pntd.0009517)
Supplement: S6 Table — (XLSX) [file pntd.0009517.s009.xlsx]

## Sheet: S6 Table
S6 Table. Bartonella DNA screening in phlebotomine sand flies from low jungle (Madre de Dios), high jungle (San Martin and Cajamarca) and inter Andean Valley (Ancash) regions in Peru.
Region	Study Site	Trap type	Lutzomyia species	Total females screened	Total pools screened	ITS/gltA PCR (+) pools
Madre de Dios	Flor de Acre, Iberia	UV	Lu. whitmani	63	9	1
		All trap types	Other sand fly species	214	38	0
San Martin	Bocatoma de Shilcayo	CDC, MM	Lu. hirsuta hirsuta	106	14	2
		All Trap types	Other sand fly species	159	33	0
	Centro de Rescate Urku	CDC, UV	Lu. nevesi	150	37	7
		All Trap types	Other sand fly species	84	34	0
	Cordillera Escalera Lodge	Blue LED	Lu. nevesi	88	13	5
		UV	Lu. sherlocki	6	2	1
		All Trap types	Other sand fly species	18	13	0
Cajamarca	San José de Lourdes	Blue LED	Lu. maranonensis	53	16	1
		All Trap types	Other sand fly species	100	27	0
Ancash	Choquechaca	All Trap types	Lu. verrucarum	408	45	0
		UV	Lu. peruensis	1	1	0
			Total	1450	282	17
